1 **Insect egg-killing: a new front on the evolutionary arms-race between Brassicaceae plants and**  
2 **Pierid butterflies**

3

4 Eddie Griese<sup>1,2</sup>, Lotte Caarls<sup>1</sup>, Setareh Mohammadin<sup>1</sup>, Niccolò Bassetti<sup>1</sup>, Gabriella

5 Bukovinszkye' Kiss<sup>1,3</sup>, Floris C. Breman<sup>1</sup>, Erik H. Poelman<sup>2</sup>, Rieta Gols<sup>2</sup>, M. Eric Schranz<sup>1</sup> and

6 Nina E. Fatouros<sup>1,\*</sup>

7

8 <sup>1</sup>Biosystematics Group, Wageningen University, Wageningen, The Netherlands

9 <sup>2</sup>Laboratory of Entomology, Wageningen University, Wageningen, The Netherlands

10 <sup>3</sup>Current address: Laboratory of Genetics, Wageningen University, Wageningen, The Netherlands

11 \*corresponding author: [nina.fatouros@wur.nl](mailto:nina.fatouros@wur.nl)

12

13 **Abstract**

14 Evolutionary arms-races between plants and herbivores have been proposed to generate key  
15 innovations that can drive diversification of the interacting species. Recent studies reveal that plant  
16 traits that target herbivore insect eggs are widespread throughout the plant kingdom. Within the  
17 Brassicaceae family, some plants express a hypersensitive response (HR)-like necrosis underneath  
18 the eggs of specialist cabbage white butterflies (Pieridae) that leads to eggs desiccating or dropping  
19 of the leaf. Here, we studied the evolutionary basis of this trait, its egg-killing effect on and  
20 elicitation by specialist butterflies, by screening 31 Brassicaceae species and nine Pieridae species.  
21 We show that induction of HR-like necrosis by pierid egg deposition is clade-specific in the  
22 economically important Brassicaceae tribe (Brassica crops and close-relatives) and in the first-  
23 branching genus *Aethionema*. The necrosis is elicited only by pierid butterflies that feed on  
24 Brassicaceae plants; four *Pieris* and *Anthocharis cardamines* butterflies, of which the larvae are  
25 specialists on Brassicaceae, elicited a HR-like necrosis. Eggs of pierid butterflies that feed on

26 Rhamnaceae (*Gonepteryx rhamni*) or Fabaceae (*Colias* spp.) however, did not elicit such a leaf  
27 necrosis. Finally, eggs of *Aglais io*, a species of the sister group Nymphalidae, did not elicit any  
28 visible response. Counter-adaptations to HR-like necrosis might have evolved by insect deposition  
29 of eggs in clusters or on inflorescences. Our findings suggest that the plants' egg-killing trait is a  
30 new front on the evolutionary arms-race between Brassicaceae and pierid butterflies beyond the  
31 well-studied chemical defence traits against caterpillars.

32

33 Key words: induced plant defences, counter adaptation, coevolution, plant-insect interaction, egg  
34 deposition, hypersensitive response

35

36

37

38

## 39 **Introduction**

40 The biodiversity on earth is shaped by numerous factors including inter-organismal interactions that  
41 can result in coevolution of adaptive traits. For example, the coevolutionary interactions between  
42 plants and insects as described by Ehrlich and Raven<sup>1</sup> has driven the diversification of plant  
43 defensive metabolites<sup>2,3</sup>. In turn, specialist herbivores have evolved detoxification mechanisms,  
44 which allow them to feed on their host plants despite these toxic metabolites<sup>4,5</sup>, e.g. monarch  
45 butterflies can feed on cardenolide-containing milkweeds<sup>6,7</sup>, and Pieridae and *Plutella* caterpillars  
46 on glucosinolate-containing Brassicaceae<sup>8-10</sup>.

47

48 The role of plant defences against herbivore eggs has been understudied and underappreciated,  
49 especially in a coevolutionary perspective between herbivores and plants. The majority of studies  
50 on plant-insect interactions have focused on the feeding life stages of herbivorous insects. Yet,  
51 plants can already perceive and respond physiologically to the presence of herbivore eggs before  
52 they hatch<sup>11</sup>. The evolution of plant defences against insect eggs is an important first line of  
53 defence. In almost half of the ~400.000 known herbivorous insects, especially in case of  
54 lepidopteran and sawfly species, eggs may be the first life stage to come into contact with the  
55 targeted host plant. Every insect egg being detected and killed, is one less herbivorous larva or adult  
56 insect feeding on the plant in the near future.

57

58 Different types of plant defences against insect eggs have been reported in more than thirty plant  
59 species including gymnosperms and angiosperms (both monocots and eudicots)<sup>12</sup>. In response to  
60 insect egg deposition, plants can produce ovicidal substances<sup>13</sup>, form neoplasms<sup>14,15</sup> or express a  
61 hypersensitive response (HR)-like necrosis beneath the eggs<sup>15-19</sup>. Specifically, HR-like necrosis as  
62 an egg-killing defence leading to eggs desiccating and/or falling off the leaf. It has so far been

63 observed in plants of the Pinaceae<sup>20</sup>, Poaceae<sup>21</sup>, Fabaceae<sup>22</sup>, Solanaceae<sup>15,16</sup> and Brassicaceae<sup>17-19,23</sup>  
64 families. However, the phylogenetic occurrence of the egg-killing trait across these plant families  
65 and the phylogenetic co-occurrence in the reciprocal insect pest-clade has yet to be investigated in a  
66 similar manner to recent studies of plants and their insect herbivores such as the Brassicaceae plants  
67 and Pieridae caterpillars.

68

69 Sequence-based phylogenetic analysis<sup>24-26</sup> has established that the Brassicaceae family is split into a  
70 core clade containing 3680 species, sub-divided into three major lineages, and a smaller sister clade  
71 containing only the genus *Aethionema* (61 species<sup>27,28</sup>). The model plant *Arabidopsis thaliana* is a  
72 representative of Lineage I and the *Brassica* crop plants are representatives of Lineage II. Lineage  
73 III is a smaller group mostly restricted to Asia and lacking a model or crop species. Cleomaceae is  
74 the sister family of the Brassicaceae<sup>29</sup>. Within the Brassicaceae, defences against feeding herbivores  
75 and the genetic basis of this defence have intensively been studied<sup>30-33</sup>. Aliphatic glucosinolates  
76 evolved as defensive compounds near or at the origin of the Brassicales clade and became more  
77 diverse and complex with plant species radiation. While these compounds play an important role in  
78 defending the plants against herbivory, many feeding insects have specialized and evolved effective  
79 glucosinolate detoxification and/or excretion mechanisms<sup>8,34-36</sup>.

80

81 The Pieridae (whites and sulphurs), containing some 17000 species today, use two major host plants  
82 belonging to the Fabales (Fabaceae) and Brassicales (Brassicaceae, Resedaceae, Capparaceae and  
83 Cleomaceae); species in some clades also shifted to Rosales (Rhamnaceae, Rosaceae) or  
84 Santalales<sup>9,37</sup>. Recent phylogenetic reconstruction of the Pieridae indicate that the ancestral host  
85 appears to be Fabaceae with multiple independent shifts to other orders. While the Dismorphiinae  
86 and nearly all Coliadinae are Fabales feeders, the sister to the Coliadinae, Pierinae, primary feed on  
87 Brassicales<sup>38</sup>. The latter thus represent a single origin of glucosinolates feeding<sup>9</sup>. Shortly after the

88 initial evolution of the order Brassicales, some ancestral Pierinae were able to evolve nitrile-  
89 specifier proteins (NSPs) that detoxify glucosinolates. This enabled a host shift from their prior  
90 Fabaceae hosts to the Brassicales roughly 80 million years ago<sup>9,37</sup>. Similarly, the evolution of  
91 glucosinolate sulfatase in *Plutella xylostella* allowed the caterpillar of these moths to feed on  
92 Brassicaceae<sup>8</sup>. It has been shown that speciation-rate shifts, as well as genome-duplication events  
93 with gene birth-death dynamics, occurred in both Brassicales and Pieridae, usually following a key  
94 defence (glucosinolates) or counter-defence (NSPs and sulfatase) invention in one of the  
95 coevolutionary partners<sup>37</sup>. To pinpoint the evolution of transitions and innovations, it is necessary to  
96 have investigate the trait(s) of interest in a proper phylogenetic context. Defence responses targeting  
97 eggs might add a new layer of traits evolved in response to herbivore specialization. Egg-killing  
98 responses could then be understood as a first-line-of-defence on top of the later acting glucosinolate  
99 defence system.

100

101 Eggs of the specialist herbivore *Pieris brassicae* induce HR-like necrosis in the crop plants *Brassica*  
102 *rapa*, *B. napus* and *Raphanus sativus*<sup>12,39</sup>. However, egg-induced responses have mainly been  
103 studied in the black mustard *Brassica nigra* and the model plant *A. thaliana*. On *A. thaliana* egg  
104 deposition induces a localized cell death response and higher expression of defence genes  
105 resembling HR against pathogens, but a visible necrosis is not expressed and egg-killing never been  
106 shown<sup>40,41</sup>. Egg-killing due to a strong necrosis has been shown for the black mustard *B. nigra*.  
107 Within *B. nigra*, HR-like necrosis shows high intraspecific variation. Several *B. nigra* accessions  
108 were tested with regard to their ability to express HR-like necrosis in response to egg depositions,  
109 with some accessions being more likely to express this trait than others<sup>17,18,23</sup>.

110

111 The current study explores whether egg-killing necrosis evolved as a specific response to pierid egg  
112 deposition in a subset of Brassicaceae. So far, no large-scale screening has been done within the

113 family to determine how common the egg-killing necrosis is expressed within the family.  
114 Furthermore, no effort has ever been made to map the phylogenetic history of any egg defence trait  
115 for any plant family. Doing so would be a first necessary step to show an adaptive response to egg  
116 deposition. For this study we first established that egg wash generated from eggs of *P. brassicae*  
117 butterflies and egg deposition on plants yielded a similar plant response on *B. nigra* plants. We then  
118 used a representative collection of species in the Brassicaceae (mainly lineage I and II) and three  
119 species in the Cleomaceae to investigate the phylogenetic occurrence of egg-killing necrosis across  
120 the family. Furthermore, we explored the reciprocal phylogenetic co-occurrence in the Pieridae  
121 clade and related species. We compared elicitation of HR-like response by egg deposition and egg  
122 wash of three other *Pieris* butterflies (Pierinae) as well as by three relatives, *Anthocharis*  
123 *cardamines* (Pierinae) feeding on *Cardamine* plants of Lineage I, *Colias* spp. (Coliadinae) feeding  
124 on Fabaceae and *Gonopteryx rhamni* (Coliadinae) feeding on *Rhamnus* plants belonging to  
125 Rhamnaceae. As an outgroup, we used the butterfly *Aglais io* (Lepidoptera: Nymphalidae) that  
126 feeds on *Urtica* plants (Urticaceae). We addressed the following questions: (i) Is HR-like necrosis  
127 induced in a clade-specific manner within the Brassicaceae? (ii) Is the observed necrosis lowering  
128 egg survival under greenhouse and field conditions? (iii) Is elicitation of HR-like necrosis by eggs  
129 specific to a particular clade of butterfly species (e.g. genus, subfamily or family) and/or specific to  
130 species that co-evolved with the Brassicaceae?

131

## 132 **Material and Methods**

### 133 *Plants and insects*

134 For our study, we obtained seeds of twenty-eight Brassicaceae and three Cleomaceae species from  
135 various sources. The selected plants represent the major lineages in each family. For each plant  
136 species, between one and eleven accessions were obtained (Table S1). Per accession, between three  
137 and seventeen plants were phenotyped across members of the two families. Two accessions of *B.*

138 *nigra* (SF48, SF19) were used to assess elicitation of the HR-like necrosis by different butterfly  
139 species. Finally, egg-killing was tested for four responsive plant species with the same number of  
140 genotypes per species. In preliminary trials, plant species with unknown developmental times were  
141 grown to assess their flowering time after sowing. Then, plants were sown in a scheme to ensure  
142 similar life stages, i.e. vegetative growth, and sizes if possible. Therefore, plants were between three  
143 and six weeks old when being treated with butterfly eggs or egg wash.

144 For phenotyping the Brassicaceae we used the wash of *Pieris brassicae* eggs. To assess induction of  
145 HR-like necrosis on *B. nigra* plants, we used egg deposition from two populations of *P. brassicae*,  
146 *P. napi* L. and *P. rapae* L. and one population of *P. mannii* Mayer (Table S2). Furthermore, we  
147 tested egg wash from three populations of *A. cardamines* L., and one population of *G. rhamni* L.  
148 and *A. io* L. (Lepidoptera: Nymphalidae) (Table S2). Finally, survival was measured for eggs of *P.*  
149 *brassicae*, *P. napi* and *P. rapae*.

150 *Pieris brassicae*, *P. napi* and *P. rapae* were reared on *Brassica oleracea* var. *gemmifera* cv. *Cyrus*  
151 in a greenhouse compartment ( $21 \pm 4^\circ\text{C}$ , 60–80% RH, LD 16: 8). *Pieris mannii* was reared in the  
152 same greenhouse, but instead on flowering *Iberis* spp. plants. One population of *A. cardamines* was  
153 obtained from a butterfly farm Farma Motyli Zielona Dolina (Babidół, Poland) as hibernating  
154 pupae. Hibernation was broken by storing the pupae at  $4^\circ\text{C}$  in a cold storage room for five months  
155 and another month outdoors. After hibernation, the butterflies were kept in a greenhouse  
156 compartment ( $18 \pm 2^\circ\text{C}$ , 50–60% RH, LD 16: 8) with flowering *Cardamine hirsuta* and *Sisymbrium*  
157 *irio* plants to obtain eggs. *Aglais io* butterflies were kept in cages outside (May to June 2018) with  
158 cuttings of *Urtica* sp. plants on which they oviposited. Eggs and/or adults of *A. cardamines*, *Colias*  
159 spp. and *G. rhamni* were also collected outdoors (for locations see table S2); adults were released  
160 again when sufficient egg depositions were obtained. *Pieris brassicae* and *A. io* both lay egg  
161 clutches, *P. napi* sometimes lays eggs in small groups, while *A. cardamines*, *G. rhamni*, *P. mannii*  
162 and *P. rapae* lay single eggs.

163

164 *Egg wash preparation*

165 Wash from *P. brassicae* eggs was made by fostering females to oviposit on filter paper by pinning  
166 the paper to the underside of leaves of *B. oleracea* (Fig. 1a). Within 24 hours after oviposition, the  
167 filter paper with the eggs was cut and placed into a 15 ml Falcon tube with purified water  
168 (purification system from Millipore Company) at a concentration of 400 eggs per ml. The eggs were  
169 left overnight at room temperature. The next morning the supernatant was pipetted off and stored at  
170 -20 °C. Before using the egg wash, Tween20 was added at a 0.005 % concentration. The addition of  
171 Tween20 was necessary to lower the surface tension of the water droplets, therefore improving the  
172 distribution of the egg wash on the waxy leaf surface of some plant species.

173



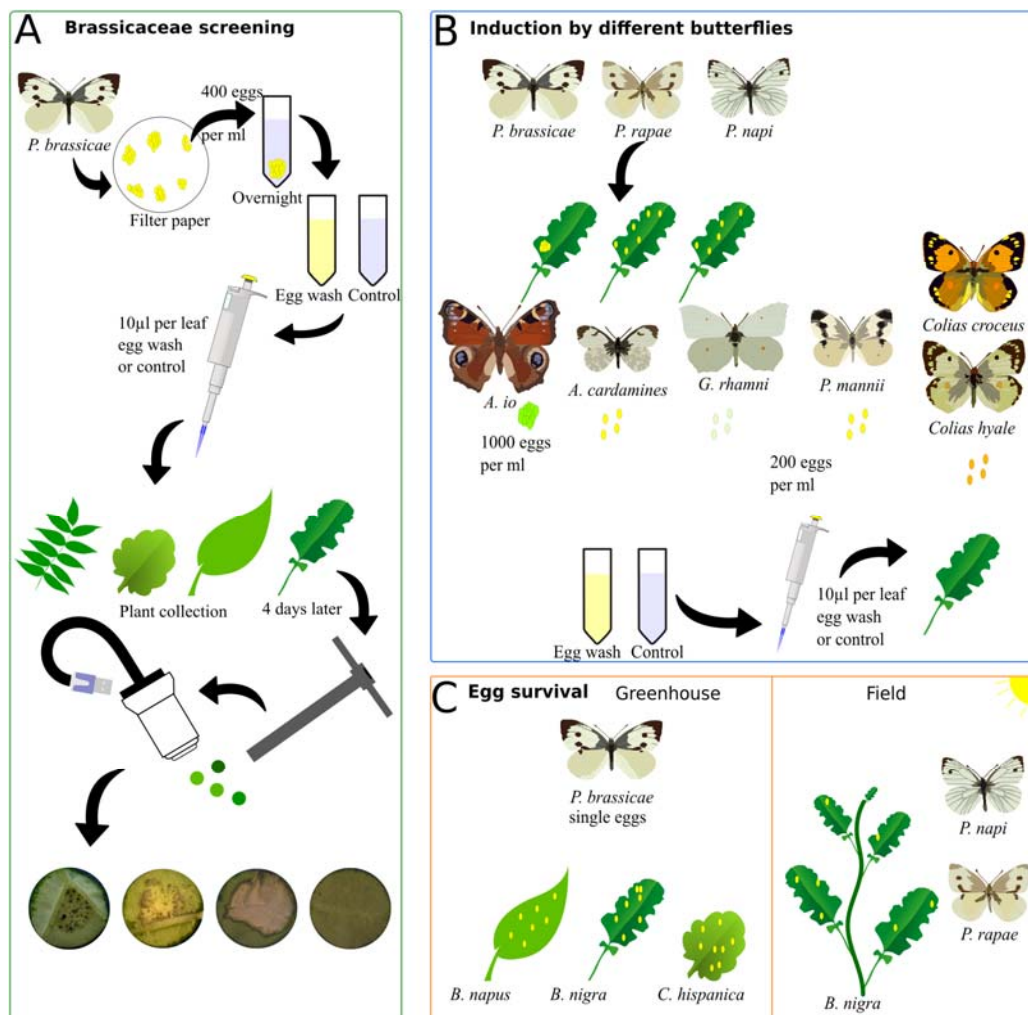

174 **Figure 1:** Scheme for plant treatments and phenotyping of HR-like necrosis. A) Production and use  
 175 of wash from *P. brassicae* egg clusters for a screening of 31 plant species, each of which consisted  
 176 of 1 to 10 plant accessions. B) Use of eggs or egg wash from different butterfly species to determine  
 177 which species elicits a necrosis in *B. nigra* accessions. C) Use of singly laid *P. brassicae* eggs to  
 178 determine the egg-killing effect of HR-like necrosis on *B. napus*, *B. nigra* and *C. hispanica*  
 179 accessions. From the field *P. napi* and *P. rapae* eggs were collected from *B. nigra* and hatching  
 180 (survival) observed.

181

182 Wash from *A. io*, *G. rhamni* and *A. cardamines* eggs was made by removing eggs from leaves of

183 *Urtica* sp. (*A. io*) or *Rhamnus* sp. (*G. rhamni*) and floral inflorescences of *C. hirsuta* or *S. irio* (*A.*

184 *cardamines*). These eggs were immersed in pure water (*A. io*) or 20 mM 2-(*N*-morpholino) ethane-  
185 sulfonic acid (MES) buffer (*A. cardamines*) and left overnight. We chose a concentration of 1000  
186 eggs per ml for *A. io*, as egg size is lower than of Pierini eggs (compare database on egg size from  
187 more than 10.000 insect species: <https://shchurch.github.io/dataviz/index.html>). As controls, clean  
188 *Urtica* sp. leaves for *A. io*, a mixture of *C. hirsuta* and *S. irio* inflorescence stems for *A. cardamines*,  
189 clean leaves of *Rhamnus frangula* L. for *G. rhamni*, and inflorescence stems of *Iberis* spp. For *P.*  
190 *mannii* were washed in the same manner. Eggs and leaves were kept in the solution overnight, after  
191 which the supernatant without eggs was pipetted off and stored at -20 °C. As these egg washes were  
192 tested on *B. nigra* plants, no Tween20 was added to the washes.

193

#### 194 *Phenotyping of HR-like necrosis of Brassicales plants*

195 Experiments were carried out in a greenhouse compartment to standardize plant-growth conditions  
196 (22-27°C, Rh: 50-90%, L:D: 16:8). For the screening of twenty-eight Brassicaceae and three  
197 Cleomaceae plant species, 5 µl of *P. brassicae* egg wash was pipetted on a fully mature leaf (the  
198 third or fourth leaf from the top) of each plant. Another fully matured leaf (the third or fourth from  
199 the top) received pure water with Tween20 as a control. After four days, leaf disks were harvested  
200 of the area where egg wash had been applied using a cork borer (1 cm) and put in a rectangular Petri  
201 dish with wet blue filter paper. Pictures were taken using a Dino-Lite digital microscope (AnMo  
202 Electronics Corporation). These pictures were visually scored for expression of HR-like necrosis  
203 (Fig. 1a).

204

#### 205 *Testing for elicitation of HR-like necrosis by diverse Pieridae species*

206 Female butterflies of *P. brassicae* (2 populations), *P. napi* and *P. rapae* (2 populations) were  
207 allowed to lay between five to ten eggs on two different *B. nigra* accessions (SF19 and SF48)  
208 (Supplementary Table 1). Accession SF19 is known as a low responder with respect to egg HR-like

209 necrosis and SF48 as a strong responder<sup>18</sup>. *Anthocharis cardamines*, *Colias* sp. and *G. rhamni* egg  
210 wash was pipetted on both *B. nigra* accessions (Supplementary Table 1). The nymphalid Peacock  
211 butterfly *A. io* was used as an outgroup. Eggs laid on *Urtica* leaves were collected and an egg wash  
212 made as well as a control wash made from *Urtica* leaves and pipetted on plants of the same *B. nigra*  
213 accessions. Between 17 and 40 plant replicates per *B. nigra* accession were used for each butterfly  
214 population (Fig. 1b). After four days, HR-like necrosis was scored using a slightly adapted scoring  
215 system previously described by Griese et al.<sup>18</sup>. For this scoring system a number between 0 (no  
216 response) and 4 (very strong response on both sites of the leaf) is assigned to the observed necrosis.  
217

#### 218 *Pieris brassicae* egg survival on HR-like expressing plants

219 Experiments were done in greenhouse conditions (21 ± 5°C, Rh: 45 - 70%, L16 : D8). HR-like  
220 necrosis has been shown to have weaker effects on egg-survival under greenhouse conditions than  
221 under natural conditions<sup>17,18</sup>. *Pieris brassicae* females were manipulated to lay five to fifteen  
222 separated eggs (not touching each other) on all lines of *B. napus*, *B. nigra* and *C. hispanica* used in  
223 the screening of Brassicaceae species. Previous studies revealed that *P. brassicae* egg survival was  
224 only affected when eggs were laid singly, not touching each other<sup>18</sup>. The oviposition of separated  
225 eggs was accomplished by observing the females and taking them off the leaf after they laid one  
226 egg. After this, the females were put on a different spot of the same leaf. The eggs were left on the  
227 plant and four days after oviposition HR-like necrosis was scored as present or absent. After five  
228 days, survival of eggs was noted by counting the number of hatched caterpillars (Fig. 1c).

229

#### 230 *Pieris brassicae* egg survival assessed by field survey

231 A survey was conducted to record survival of *Pieris* eggs on individual *B. nigra* plants in a natural  
232 population (compare Fatouros, et al.<sup>17</sup>). The survey was conducted at an established *B. nigra* patch  
233 along the River Rhine in Wageningen (Steenfabriek), The Netherlands (coordinates: 51.96°N,

234 5.68°E) in one season and butterfly generation (August—September 2017). The total area  
235 monitored was approximately 100 m<sup>2</sup> consisting of ~1000 plants. Plants were monitored for eggs at  
236 the edges of a patch or on isolated growing plants So that not all ~1000 plants were monitored.  
237 Eggs were collected on leaves and checked for the presence of a HR-like necrotic zone on the leaf.  
238 After collection, eggs were kept in a climate chamber (25 ± 1°C, 50–70 % RH, L16 : D8) until  
239 caterpillars emerged. All hatched and dead eggs were recorded (Fig. 1c).

240

#### 241 *Phylogenetic analysis of Brassicales and Pieridae species*

242 We used a consensus tree to place our tested Brassicales species according to the species (or genera)  
243 reported by two recent studies<sup>25,26</sup>. Both studies analyse representatives of the three distinct lineages  
244 of the core Brassicaceae clade and the first-branching *Aethionema* and the outgroup Cleomaceae.  
245 We used the established three-lineage classification when planning and conducting our experiments.  
246 As some species and genera were not present in either study, we established their relationships with  
247 other included species by calculating our own phylogenetic tree using DNA sequences of two  
248 chloroplast markers (*rbcL* and *matK*) and one nuclear genome marker (*ITS2*). The sequences were  
249 obtained from the BOLD system website (ID numbers see Supplementary Table 3)<sup>42</sup>. The  
250 phylogenetic tree was inferred under maximum likelihood using RaxML v 8.2.4 (GTR+GAMMA,  
251 random seed and 1000 bootstrap pseudo-replicates) on the CIPRES science gateway<sup>43,44</sup>. The three  
252 Cleomaceae species were used as outgroups for the phylogenetic tree.

253 The phylogenetic tree of the butterfly species was created using the mitochondrial *COI* gene and the  
254 nuclear *EFl $\alpha$*  (Supplementary Table 4). The phylogenetic tree was inferred using maximum  
255 likelihood through the IQ TREE website<sup>45-47</sup>. The models selected here for each of the partitions  
256 were GTR+F+I+G4:part1, TIM2e+G4:part2, random seed and 1000 ultrafast bootstrap pseudo-  
257 replicates. We verified that each clade of butterflies in the tree contained more species than were  
258 used in our test to improve separation. *Plutella xylostella* L. was used as an outgroup. The

259 phylogeny showed support for splits within the Pieridae family and the genera were well supported.  
260 The phylogeny is very similar to a more extensive study with more species that used two more  
261 markers, *wingless* and 28S<sup>48</sup>.  
262 A Bayesian approach was also performed for phylogenetic inference of the butterflies using the  
263 program MrBayes version 3.2<sup>49</sup> on the same dataset using as priors the parameters from the models  
264 selected by IQ TREE and using the same partition of the data. Four simultaneous chains (one cold,  
265 three heated) were run for ten million generations, and trees were sampled every 1,000 generations.  
266 To check the convergence and stability of the parameter estimates and to determine the burn-in  
267 value, Tracer v1.5<sup>50</sup> was used to explore the log files. Initial trees generated in the burn-in phase  
268 (i.e., before establishing stable estimates of parameters) were discarded (burn-in value= 2500, 25 %  
269 of the trees). The remaining trees were used to estimate tree topology, branch lengths, and  
270 substitution parameters. The phylogenetic relationships inferred from this bayesian approach were  
271 congruent with the ML tree obtained from the analysis above.

272

### 273 *Statistical analysis*

274 To test for statistical significance, R version 3.3.2 “Sincere Pumpkin Patch”<sup>51</sup> was used. For the  
275 screening of plant accessions,  $\chi^2$ -tests were used to determine which plant species/genotypes  
276 significantly expressed HR-like necrosis after egg wash treatment compared to the control  
277 treatment. The contingency tables for the  $\chi^2$ -tests consisted of the number of egg wash-treated  
278 leaves expressing HR-like necrosis, the number of egg wash-treated leaves not expressing HR-like  
279 necrosis, the number of control wash-treated leaves expressing HR-like necrosis and the number of  
280 control wash-treated leaves not expressing HR-like necrosis. With this set-up, all plant accessions  
281 from each plant species were tested independently.  
282 Egg survival was analysed using binomial generalized linear models (GLMs) in which first all  
283 variables (plant species, flowering state, HR expression and all interactions between the factors)

284 were used and then based on Akaike information criterions (AICs) removed to simplify the model  
285 (plant species, HR expression and interaction). After this, EMMEANS test or Mann-Whitney-U  
286 tests were performed as post-hoc tests. Differences in induction of HR-like necrosis by different  
287 butterflies were tested using binomial GLMs and, to test differences in strength, GLMs with  
288 Poisson distribution Dunn tests with Bonferroni-Holm correction were used as post-hoc tests.

289

## 290 **Results**

### 291 *Establishing egg wash as an alternative treatment for natural egg deposition*

292 Not all tested butterfly species naturally deposit eggs on (all) brassicaceous species. In order to be  
293 able to test eggs of those species and screen a large number of brassicaceous species efficiently, we  
294 developed a standard method to wash eggs and treat plants with egg wash. We first compared the  
295 effect of eggs and egg wash on *B. nigra*, and scored symptoms induced by oviposition or egg wash,  
296 scoring a number between 0 (no response) and 4 (very strong response). The accession SF48  
297 responded with a score between 1-4 in all plants (Supplementary Figure 1). There was no statistical  
298 difference between class of symptoms induced by eggs or egg wash (GLM:  $\chi^2 = 1.43$ ,  $df = 1$ ,  $P =$   
299 0.232), and so we concluded that we could use egg wash to test the effect on all species.

300

### 301 *Origin of HR-like necrosis in the core Brassicaceae, Aethionema and Cleomaceae*

302 Of all thirty-one species tested, five species responded significantly with HR-like necrosis to *P.*  
303 *brassicae* egg wash. This included species of the genus *Aethionema* and of the tribe Brassiceae (Fig.  
304 2). In the tribe Brassiceae, egg wash treatment significantly enhanced expression of HR-like  
305 necrosis in specific accessions of four species: *B. napus* (25-86%), *B. nigra* (63-83%), *B. oleracea*  
306 (20-40%) and *C. hispanica* (0-86%) (Supplementary Table 5). There was no significant enhanced  
307 HR-like necrosis after egg wash treatment for all other tested plant species tested compared to  
308 control leaves. Necrosis was expressed in single plants of some accessions in lineage I and III (0

309 and 29%) (Fig. 2, Supplementary Table 5). HR-like necrosis of *Aethionema arabicum* varied among  
310 the tested accessions between 0 and 60 % (Supplementary Table 5). In some cases, e.g. for  
311 *Aethionema carneum*, plants responded with HR-like necrosis to egg wash, however, due to the low  
312 number of replicates (*A. carneum*: three plants) difference between control and egg wash treatment  
313 was not significant (Supplementary Table 5). For *Lunaria annua*, up to 40% expressed HR-like  
314 necrosis, but for this plant species only few replicates were tested, making it impossible to test for  
315 significant differences (Supplementary Table 5).

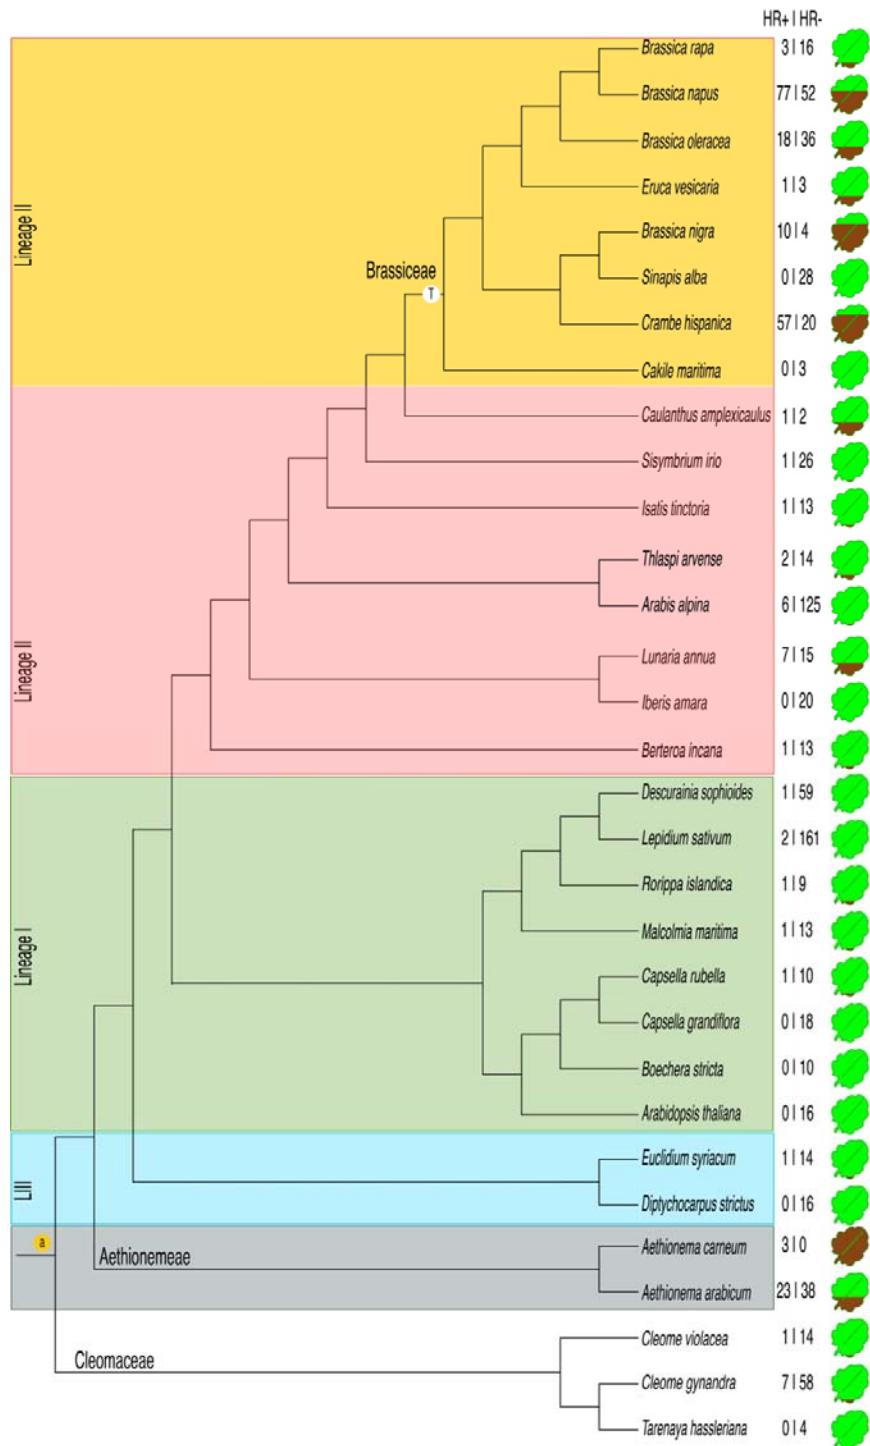

316

317 **Figure 2:** Phylogenetic tree of all plant species treated with *P. brassicae* egg wash and the  
 318 resulting- fraction of necrosis after 4 days. Consensus phylogeny based on literature and our own  
 319 analysis of 3 marker genes: *rbcL* and *matK* and one nuclear genome marker: *ITS2* used. The brown



320 part of the leaf shape represents the percentage of tested plants per plant species responding to egg  
321 wash with necrosis. Asterisks indicate that at least one plant accession within the species showed  
322 significantly more HR-like necrosis on leaves treated with egg wash than on control treated leaves  
323 ( $\chi^2$ -tests,  $P < 0.05$ ). Phylogenetic clades are coloured differently in the tree. The whole genome  
324 duplication WGD (a) and genome triplication (T) the Brassiceae tribe specific events are marked in  
325 the tree.

326

327 *Elicitation of HR-like necrosis by different butterfly species correlated with phylogenetic signal*

328 Egg deposition by all *Pieris* spp. and egg wash of *A. cardamines* elicited a HR-like necrosis on both  
329 tested *B. nigra* accessions; the low responding SF19 and as the strong responding SF48. Egg wash  
330 of *G. rhamni* and *Colias* spp. did not elicit a HR-like necrosis. Notably, egg wash of both species  
331 induced the formation of chlorotic tissue (Fig. 3). Egg wash from *A. io* neither elicited a chlorosis  
332 nor HR-like necrosis on either *B. nigra* accession (Table 1). When several populations were  
333 available for butterfly species, all populations elicited HR-like necrosis in similar frequency (GLM:  
334  $\chi^2 = 1.36$ ,  $df = 3$ ,  $P = 0.71$ ) and severity (GLM:  $\chi^2 = 2.60$ ,  $df = 3$ ,  $P = 0.46$ ).

335

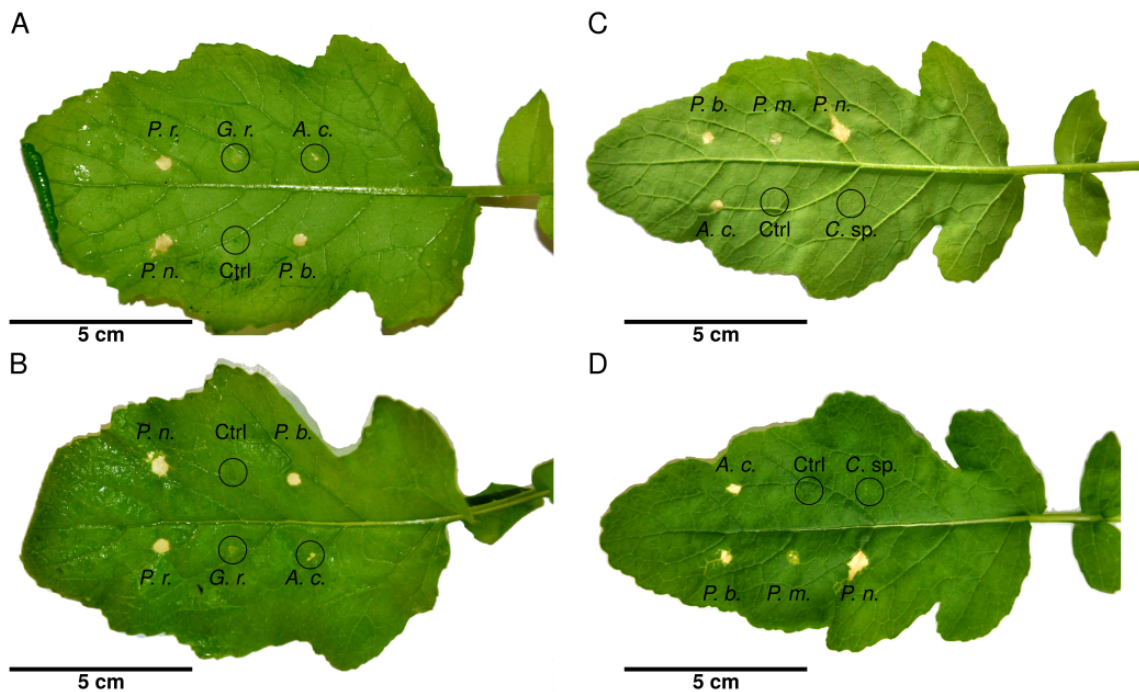

336

337 **Figure 3:** Leaves from *B. nigra* treated with egg wash of different butterfly species and controls  
338 inducing or not a HR-like necrosis. *Pieris brassicae* (*P. b.*), *P. manii*, (*P. m.*), *P. napi* (*P. n.*), and  
339 *P. rapae* (*P. r.*) and *Anthocharis cardamines* (*A. c.*) induce a strong HR-like necrosis. Egg wash of  
340 *G. rhamnii* (*G. r.*) and *Colias* sp. (*C. sp.*) induces a very faint response resembling a chlorosis and  
341 does not fit into the established scoring system (faintness indicates 1, but showing up on both sides  
342 of the leaf indicates 2). The control (buffer without eggs) does not elicit a HR-like necrosis. All egg  
343 washes had the same concentration (200 eggs per ml) and amount applied onto the leaf (5 $\mu$ l). Two  
344 leaves were needed as not all egg washes were available at the same time. A) and C) Abaxial side of  
345 the leaf where the egg washes were applied onto. B) and D) Adaxial side of the leaf showing how  
346 strong the HR-like response is on the side which was not treated with egg wash.

347 **Table 1:** HR- like necrosis (score ranging from 0 to 4) expressed by *B. nigra* plants elicited by  
348 different butterfly species. HR- plants did not express HR-like necrosis, while HR+ plants did.  
349 Different letters indicate significant differences (different when  $P < 0.025$ ) between butterfly  
350 species, Dunn-test, Bonferroni Holm corrected.

351

| Butterfly species             | HR score (SE)  | Plants<br>HR+ | Plants<br>HR- | HR fraction (SE) |
|-------------------------------|----------------|---------------|---------------|------------------|
| <i>Anthocharis cardamines</i> | 1.63 (0.10) a  | 61            | 5             | 0.92 (0.03) a    |
| <i>Aglais io</i>              | 0 (0) b        | 0             | 40            | 0 (0) b          |
| <i>Colias spp.</i>            | 0.67 (0.10) ab | 4             | 5             | 0.56 (0.18) a    |
| <i>Gonepteryx rhamni</i>      | 1.11 (0.33) a  | 8             | 10            | 0.44 (0.12) c    |
| <i>Pieris brassicae</i>       | 1.69 (0.13) a  | 53            | 12            | 0.82 (0.05) a    |
| <i>Pieris mannii</i>          | 2.14 (0.40) ac | 6             | 1             | 0.86 (0.14) ac   |
| <i>Pieris napi</i>            | 2.46 (0.16) c  | 33            | 4             | 0.89 (0.05) a    |
| <i>Pieris rapae</i>           | 1.64 (0.15) a  | 42            | 14            | 0.75 (0.06) ac   |

352

353 Eggs of all brassicaceous specialists, *Pieris brassicae*, *P. napi*, *P. rapae* and *A. cardamines* induced  
354 an equally high fraction of HR-like necrosis in *B. nigra* (Supplementary Tables 1 and 6). *Pieris napi*  
355 elicited a significantly stronger HR-like necrosis ( $2.46 \pm 0.16$ ) compared to all other butterfly  
356 species (Supplementary Tables 1 and 7). The fraction and severity of chlorotic tissue formation  
357 elicited by *Colias* spp. and *G. rhamni* was generally lower than HR-like necrosis by the eggs of  
358 *Pieris* spp and *A. cardamines* ( $0.44 \pm 0.12$ ;  $1.11 \pm 0.33$  respectively) (Table 1 and Supplementary  
359 Tables 6-7). When we plotted the fraction of HR-like necrosis and its severity per butterfly species  
360 on our phylogeny, the likelihood and severity of HR-like necrosis is stronger in butterfly species  
361 that are the more closely related to *Pieris* sp. (Fig. 4). Thus, all tested Pieridae elicited an egg  
362 response while the nymphalid butterfly *A. io* of the sister group never did.

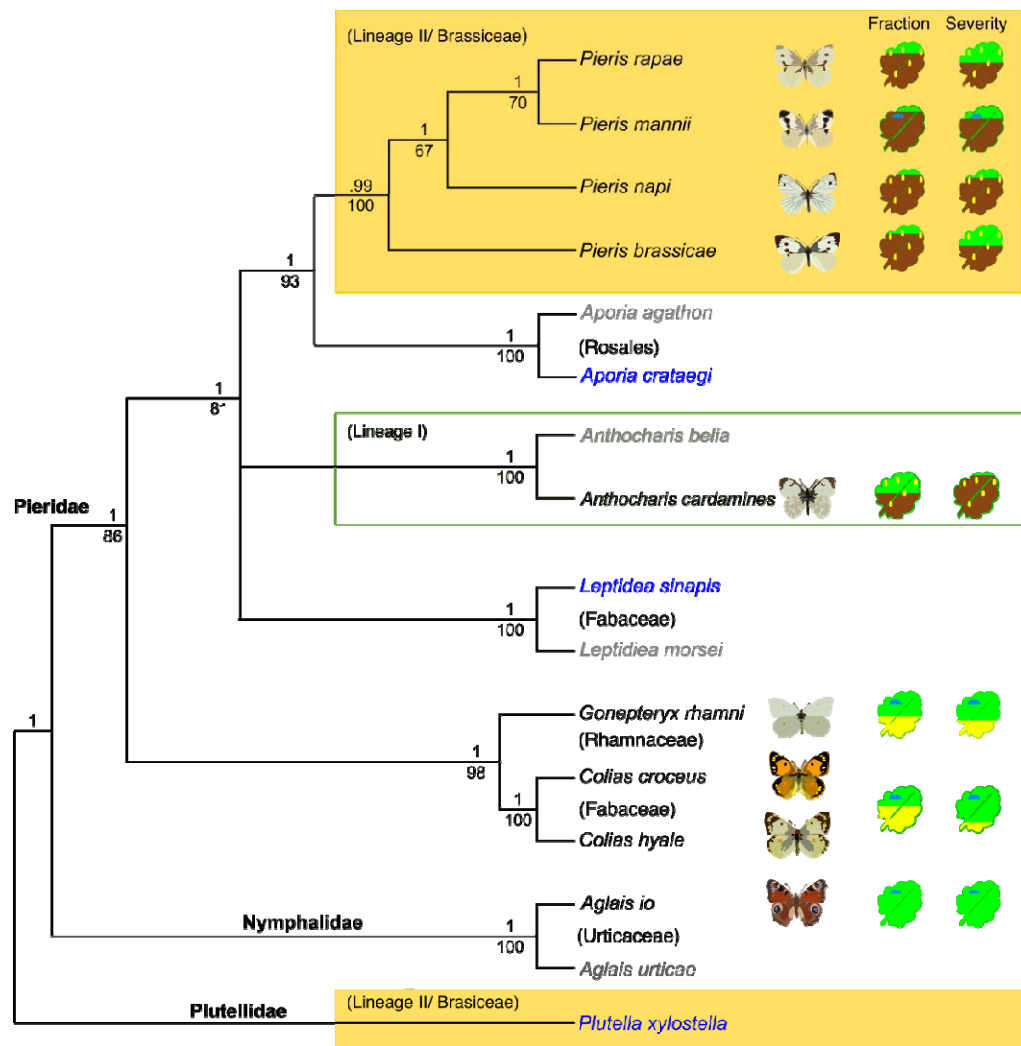

363

364 **Figure 4:** Phylogeny of a subset of Pieridae and elicitation of HR-like necrosis  
 365 by pierid egg wash or eggs. The phylogeny is based on the maximum likelihood and Bayesian  
 366 posterior probability analysis of the nuclear marker *EF1 $\alpha$*  and mitochondrial marker *COI* subunit 1.  
 367 As outgroups, the nymphalid *Aglais io* and the plutellid moth *Plutella xylostella* were chosen. The  
 368 pictograms of leaves on the right of the cladogram represent the fraction of HR-like necrosis  
 369 elicitation (left) and severity of HR-like necrosis expressed (right). The average fraction (between 0  
 370 and 1) and severity (between 0 and 4) elicited by either eggs or egg wash is represented by the  
 371 brown part of the leaf, while the yellowing in the leaves represents a different type of response  
 372 (chlorosis). The phylogenetic tree consists of species used in the experiments (black), species that

373 would answer open questions when tested (blue) and species added to more fully represent the  
374 phylogenetic tree (grey). Coloured boxes indicate the Brassicaceae lineage which the butterflies use  
375 as main host plants. Lepidopteran families are written on their nodes where they separate from the  
376 rest of the clades. Bootstrap values for the nodes are given below nodes, Bayesian values are given  
377 above.

378

### 379 *Effect of HR-like necrosis on Pieris egg survival on different Brassicaceae plants*

380 First, we also monitored egg survival of the abundant (in the Netherlands) *Pieris* species (both *P.*  
381 *napi* and *P. rapae*) under natural field conditions. Egg survival was 40 % lower when eggs induced  
382 HR-like necrosis compared to survival of eggs that did not induce a leaf necrosis (GLM:  $\chi^2 = 11.02$ ,  
383  $df = 1$ ,  $P < 0.001$ , Fig. 5a). As not all eggs on a given plant elicited a necrosis, the fraction of eggs  
384 eliciting HR-like necrosis was tested as well.

385 Second, we tested egg survival on three highly responding plant species from the first screening  
386 under greenhouse conditions. HR-like necrosis significantly lowered the survival of singly laid *P.*  
387 *brassicae* eggs on all three plant species (GLM:  $\chi^2 = 38.41$ ,  $df = 1$ ,  $P < 0.001$ , fig. 5b). Plant species  
388 alone significantly affected egg survival (GLM:  $\chi^2 = 6.38$ ,  $df = 2$ ,  $P = 0.04$ ), while the interaction  
389 did not (GLM:  $\chi^2 = 3.25$ ,  $df = 2$ ,  $P = 0.20$ ). On *C. hispanica* plants egg survival was significantly  
390 lower than on *B. napus* plants (pairwise MWU:  $P = 0.006$ , Fig. 5b).

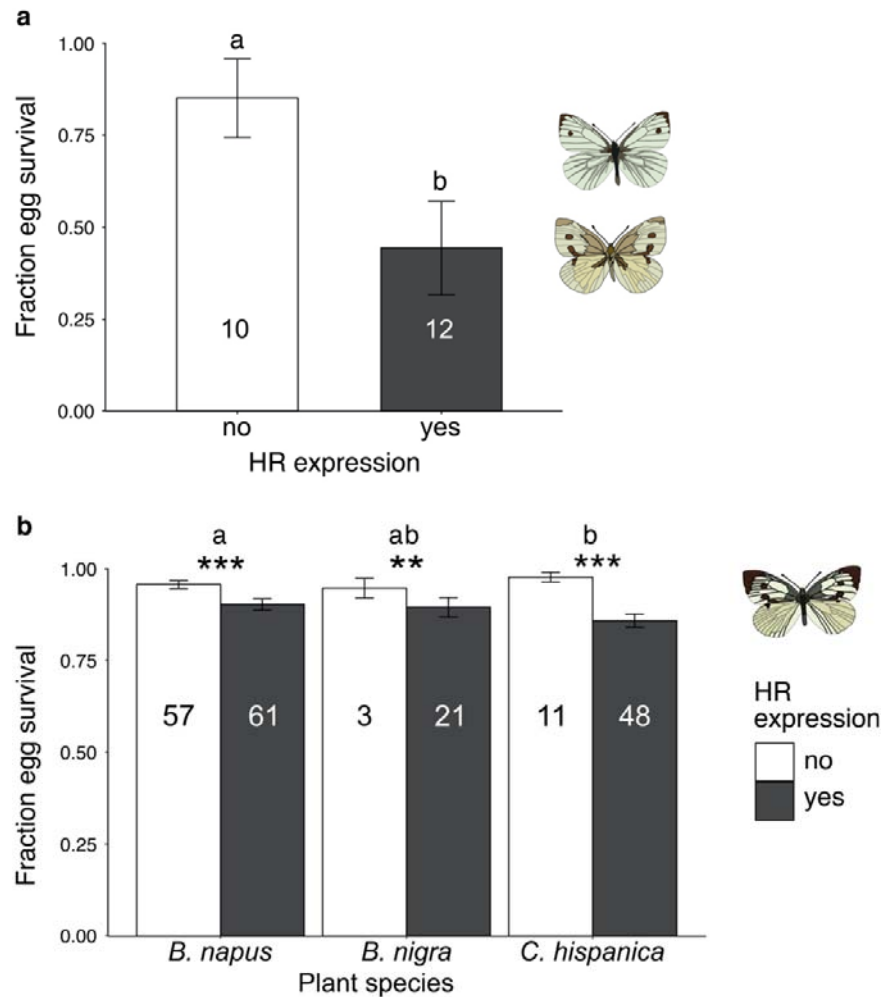

391

392 Figure 5: Survival rates of singly laid *P. brassicae*, *P. rapae* or *P. napi* eggs and effect of  
 393 expression of HR-like necrosis on different plant species. A) Survey of *P. napi* and *P. rapae* eggs  
 394 on *B. nigra* plants located near the river Rhine in Wageningen. One to 13 eggs were sampled per  
 395 plant, total number of collected eggs  $n = 96$ . Fraction of survival depending on the expression of  
 396 HR-like necrosis by the plant. If the plant expressed HR-like necrosis under at least one egg it was  
 397 counted as HR-expressing 'yes'. Different letters indicate significant differences (GLM:  $P < 0.001$ ).  
 398 Numbers in bars indicate the number of plants surveyed within each category. B) Effect of HR-like  
 399 necrosis on survival rates (mean  $\pm$  SE) of singly laid *P. brassicae* eggs on *B. napus*, *B. nigra* and *C.*  
 400 *hispanica*. Asterisks indicate differences in egg survival between plants expressing HR-like necrosis  
 401 and non-HR within a plant species. Different letters indicate significant differences in egg survival

402 between plant species, without taking HR-like necrosis into account. ns: not significant, \*\*:  $P <$   
403 0.01, \*\*\*:  $P < 0.001$ . (GLM).

404

## 405 **Discussion**

406 Pierid butterflies and their brassicaceous host plants are a fascinating model system of co-  
407 evolutionary interactions; research so far has explored its evolutionary and genetic basis by  
408 focusing on the diversifying selection on plant chemical defences, i.e. glucosinolates, and insect  
409 NSP detoxification genes<sup>9,37,52</sup>. Here, we attempt for the first time to map the phylogenetic history  
410 of an egg-induced plant defence trait and its reciprocal co-occurrence in the herbivore clade. We  
411 show that pierid egg-induced HR-like necrosis evolved in two clades within the Brassicales. Half of  
412 the tested plant species from the Brassiceae tribe in lineage II express strong HR-like necrosis to  
413 egg wash. Moreover, all tested *Aethionema* species, the sister clade to the core Brassicaceae,  
414 expressed leaf necrosis. Of the *Brassica* and *Crambe* plants (tribe Brassiceae) that were tested, the  
415 HR-like necrosis lowered egg survival both under natural and greenhouse conditions. Furthermore,  
416 we showed for the first time that only egg wash of *Pieris* butterflies and *A. cardamines*, specialist  
417 feeders on the Brassicaceae, elicit a strong HR-like necrosis on *B. nigra*. While *Colias* spp. and *G.*  
418 *rhamnii* elicited a chlorotic response similar to that of *Solanum dulcamara* to *Spodoptera* eggs<sup>53</sup>.  
419 Our results demonstrate that the egg-induced HR-like necrosis evolved as a new trait at least twice  
420 in the Brassicales, but also show that plants specifically evolved this trait to lower egg survival of  
421 those pierid species that evolved effective glucosinolate detoxification mechanisms.

422

423 Four out of eight tested Brassiceae species, as well as two tested *Aethionema* species showed  
424 consistent HR-like necrosis to *Pieris* egg wash in at least one of the genotypes tested. In other plant  
425 species, occasionally a single plant showed a light HR-like necrosis. Likely, those plants are false  
426 positives, as some plants expressed a light necrosis to control (buffer) wash as well. Alternatively, it

427 could be a general perception response of insect eggs as described for *A. thaliana*<sup>54</sup>. In the latter  
428 species it was shown that a lectin receptor kinase, LecRK-I.8, might be involved in early perception  
429 of eggs from two widely divergent species, *P. brassicae* and *Spodoptera littoralis*. The ancient  
430 genome triplication event in the Brassiceae tribe might have facilitated the evolution of the HR-like  
431 necrosis to eggs in this group by increasing the number of resistance genes underlying the trait.  
432 Work is underway to identify the genes, which will contribute to a better understanding on the  
433 evolution of HR-like necrosis. It is unlikely that the triplication event is the only factor involved in  
434 the evolution of HR-like, because *Aethionema* plants respond to *Pieris* eggs with necrosis as well.  
435 *Aethionema* species tested here are annuals that occur in dry habitats during a very short time of the  
436 year<sup>55</sup>. Interestingly, most tested Brassiceae plants and *Aethionema* are host plants for different  
437 *Pieris* butterflies. Both *P. rapae* and *P. napi* eggs are abundant in nature on *B. nigra* and its close  
438 relatives like *Sinapis arvensis*<sup>17,19,55,56</sup>. *Pieris ergane* is described to feed on several *Aethionema*  
439 species in their south eastern European habitat<sup>57</sup>.

440

441 Not all tested plant species within the Brassiceae tribe within Lineage II expressed HR-like  
442 necrosis. This could be because we only selected non-responsive genotypes of these plant species or  
443 genus. For example, *Sinapis alba*, did not show HR-like necrosis. However, previous work on the  
444 close relative *S. arvensis* showed that eggs of *P. rapae* and *P. brassicae* strongly induced HR-like  
445 necrosis<sup>39</sup>. This means that that in some genera there is trait variation between species.

446 Alternatively, some plant species might have lost the ability to express HR-like necrosis. Those  
447 plants could be less frequently used as host plants for pierid butterflies e.g. because of a  
448 phenological mismatch between the plant species and its potential specialist herbivores, as e.g. in  
449 the case of *A. thaliana*<sup>58</sup>. In central Europe, *A. thaliana* is usually not attacked by pierid butterflies,  
450 as it is rather small and usually completes its life-cycle before caterpillars could develop on the  
451 plant<sup>58</sup>. Notably, *A. cardamines* was observed to deposit eggs on *A. thaliana* in North Sweden



452 where both life cycles briefly overlap<sup>59</sup>. Yet, *Pieris* eggs have not been reported to induce a leaf  
453 necrosis lowering *Pieris* egg survival on different genotypes of *A. thaliana* including some Swedish  
454 accessions<sup>39,40,60</sup>, neither did we observe a visible necrosis on the tested genotype (Col-0) in our  
455 experiments when using *P. brassicae* egg wash.

456

457 Strong induction of HR-like necrosis seems to be highly specific to *Pieris* butterfly species  
458 belonging to the Pierinae clade and feeding on hosts belonging to the Brassiceae clade.  
459 Interestingly, another Pierinae species, *A. cardamines*, induced HR-like but feeds on hosts  
460 belonging to lineage I of the Brassicaceae (e.g. *Cardamine* sp.<sup>9</sup>). In the latter lineage we did not find  
461 species responding with HR-like necrosis. When collecting *A. cardamines* eggs from the  
462 inflorescence of *Cardamine* spp. we did not observe any HR-like necrosis (N.E. Fatouros, personal  
463 observation). Wash from eggs of species from the non-brassicaceous Coliadae subfamily, *Colias*  
464 spp. and *G. rhamni* and the nymphalid *A. io* did not elicit HR-like necrosis. This suggests that the  
465 elicitor for HR-like necrosis is specific for Pierinae butterflies that evolved with Brassicaceae plant  
466 species rather than a general molecule present in butterfly eggs. Testing more pierid species from  
467 different clades and host plant families is needed to confirm this hypothesis. So far, we also do not  
468 know if slight differences of HR-like necrosis elicitation between different *Pieris* species is caused  
469 by quantitative differences of the elicitor(s), or by changes in the chemical composition of the  
470 elicitor(s). Currently, we are analysing the chemical composition of the egg wash from the different  
471 butterfly species to identify the compounds inducing HR-like necrosis.

472

473 Previous work has shown that the NSP glucosinolate detoxification gene was a key innovation in  
474 the ancestral Pierinae enabling them to shift host plant from Fabaceae to Brassicaceae<sup>9,37</sup>. A recent  
475 study revealed another intriguing counter-adaptation to NSP genes: the speciose genus *Erysimum*  
476 has recently gained a novel type of chemical defences, the toxic cardenolides. So far, no known

477 specific adaptations to cardenolides have evolved in insect herbivores, including the Pieridae<sup>61</sup>. On  
478 the other hand, pierid butterflies may already have found ways to counter-adapt to the egg-killing  
479 HR-like necrosis. Clustered eggs of *P. brassicae* were shown to negate the egg-killing effect of the  
480 HR-like necrosis<sup>18</sup>. While other advantages of egg clustering have been proposed before<sup>62</sup>, it clearly  
481 is helpful in dealing with HR-like necrosis. Although the direct mechanisms of how clustering can  
482 protect against egg-killing HR-like necrosis are unknown, it has been shown that desiccation can be  
483 slowed down by clustering eggs<sup>18,63</sup>. This might be mitigated by the reduced egg surface area  
484 exposed to the environment, compared with single eggs. Other pierid butterflies like *A.*  
485 *cardamines*<sup>64</sup>, *P. mannii* and *P. napi* have been observed to deposit their eggs near or on  
486 inflorescence stems of their host plants (N.E. Fatouros, personal observation).

487

488 In conclusion, our findings demonstrate that various Brassicaceae plants can mount defences  
489 against insect eggs and that these might be under similar selective pressures as plant defences  
490 against feeding insects. A coevolutionary arms-race between *Pieris* butterfly eggs and plant species  
491 within the Brassicaceae clade as well as species within the sister clade *Aethionema* is likely to have  
492 occurred. These plants make use of necrotic lesions to lower egg survival and might just have  
493 evolved a new mechanism, possibly hijacked from disease resistances, to combat specialist  
494 herbivores adapted to their host plants' toxins. Being a very early, premeditated defence, the  
495 mechanism of HR-like necrosis is currently studied as a novel defensive trait to improve resistance  
496 of *Brassica* crops against *Pieris* pests.

497

498

#### 499 **Acknowledgements**

500 We thank the employees of Unifarm (Wageningen University and Research) for rearing and caring  
501 of the experimental plants used in the experiment. We are thankful to Pieter Rouweler, André

502 Gidding, Frans van Aggelen and Patrick Verbaarschot for rearing the Dutch *Pieris* butterflies used  
503 in the experiment. Centre for Genetic Resources, the Netherlands, the Leibniz-Institut für  
504 Pflanzengenetik und Kulturpflanzenforschung and BMAP consortium are thanked for the seeds.  
505 Furthermore, we thank Prof. Miltos Tsiantis from the Department of Comparative Development and  
506 Genetics, Max Planck Institute for Plant Breeding Research for kindly providing *C. hirsuta* seeds,  
507 used as host plants for *A. cardamines*. This research has been made possible by funding of the  
508 Netherlands Organisation for Scientific Research (NWO) to N.E.F. (NWO/ALW VIDI 14854 and  
509 connected Aspasia).

510

## 511 **References**

- 512 1 Ehrlich, P. R. & Raven, P. H. Butterflies and plants: A study in coevolution. *Evolution* **18**,  
513 586-608 (1964).
- 514 2 Becerra, J. X. Macroevolutionary and geographical intensification of chemical defense in  
515 plants driven by insect herbivore selection pressure. *Current Opinion in Insect Science* **8**,  
516 15-21 (2015).
- 517 3 Swain, T. Secondary compounds as protective agents. *Annual Review of Plant Physiology*  
518 **28**, 479-501 (1977).
- 519 4 Berenbaum, M. Coumarins and caterpillars: A case for coevolution. *Evolution* **37**, 163-179  
520 (1983).
- 521 5 Després, L., David, J. P. & Gallet, C. The evolutionary ecology of insect resistance to plant  
522 chemicals. *Trends in Ecology and Evolution* **22**, 298-307 (2007).
- 523 6 Cohen, J. A. Differences and similarities in cardenolide contents of queen and monarch  
524 butterflies in Florida and their ecological and evolutionary implications. *Journal of*  
525 *Chemical Ecology* **11**, 85-1038 (1985).
- 526 7 Malcolm, S. B. & Brower, L. P. Evolutionary and ecological implications of cardenolide  
527 sequestration in the monarch butterfly. *Experientia* **45**, 284-295 (1989).
- 528 8 Heidel-Fischer, H. M. & Vogel, H. Molecular mechanisms of insect adaptation to plant  
529 secondary compounds. *Current Opinion in Insect Science* **8**, 8-14 (2015).
- 530 9 Wheat, C. W. *et al.* The genetic basis of a plant–insect coevolutionary key innovation.  
531 *Proceedings of the National Academy of Sciences of the United States of America* **104**,  
532 20427-20431 (2007).
- 533 10 Wittstock, U. *et al.* Successful herbivore attack due to metabolic diversion of a plant  
534 chemical defense. *Proceedings of the National Academy of Sciences of the United States of*  
535 *America* **101**, 4859-4864 (2004).
- 536 11 Hilker, M. & Fatouros, N. E. Resisting the onset of herbivore attack: plants perceive and  
537 respond to insect eggs. *Current Opinion in Plant Biology* **32**, 9-16 (2016).
- 538 12 Fatouros, N. E., Cusumano, A., Danchin, E. G. J. & Colazza, S. Prospects of herbivore egg-  
539 killing plant defenses for sustainable crop protection. *Ecology and Evolution* **6**, 6906-6918  
540 (2016).

- 541 13 Seino, Y., Suzuki, Y. & Sogawa, K. An ovicidal substance produced by rice plants in  
542 response to oviposition by the whitebacked planthopper, *Sogatella furcifera* (Horvath)  
543 (Homoptera: Delphacidae). *Applied Entomology and Zoology* **31**, 467-473 (1996).
- 544 14 Doss, R. P. *et al.* Bruchins: Insect-derived plant regulators that stimulate neoplasm  
545 formation. *Proceedings of the National Academy of Sciences of the United States of America*  
546 **97**, 6218-6223 (2000).
- 547 15 Petzold-Maxwell, J., Wong, S., Arellano, C. & Gould, F. Host plant direct defence against  
548 eggs of its specialist herbivore, *Heliothis subflexa*. *Ecological Entomology* **36**, 700-708  
549 (2011).
- 550 16 Balbyshev, N. F. & Lorenzen, J. H. Hypersensitivity and egg drop: A novel mechanism of  
551 host plant resistance to Colorado potato beetle (Coleoptera: Chrysomelidae). *Journal of*  
552 *Economic Entomology* **90**, 652-657 (1997).
- 553 17 Fatouros, N. E. *et al.* Synergistic effects of direct and indirect defences on herbivore egg  
554 survival in a wild crucifer. *Proceedings of the Royal Society of London B* **281**, 20141254  
555 (2014).
- 556 18 Griese, E., Dicke, M., Hilker, M. & Fatouros, N. E. Plant response to butterfly eggs:  
557 inducibility, severity and success of egg-killing leaf necrosis depends on plant genotype and  
558 egg clustering. *Scientific Reports* **7**, 7316 (2017).
- 559 19 Shapiro, A. M. & DeVay, J. E. Hypersensitivity reaction of *Brassica nigra* L. (Cruciferae)  
560 kills eggs of *Pieris* butterflies (Lepidoptera, Pieridae). *Oecologia* **71**, 631-632 (1987).
- 561 20 Bittner, N., Trauer-Kizilelma, U. & Hilker, M. Early plant defence against insect attack:  
562 involvement of reactive oxygen species in plant responses to insect egg deposition. *Planta*  
563 **245**, 993-1007 (2017).
- 564 21 Yang, Y. *et al.* Quantitative trait loci identification, fine mapping and gene expression  
565 profiling for ovicidal response to whitebacked planthopper (*Sogatella furcifera* Horvath) in  
566 rice (*Oryza sativa* L.). *BMC Plant Biology* **14**, 145 (2014).
- 567 22 Garza, R., Vera, J., Cardona, C., Barcenas, N. & Singh, S. P. Hypersensitive response of  
568 beans to *Apion godmani* (Coleoptera: Curculionidae). *Journal of Economic Entomology* **94**,  
569 958-962 (2001).
- 570 23 Pashalidou, F. G., Fatouros, N. E., Van Loon, J. J. A., Dicke, M. & Gols, R. Plant-mediated  
571 effects of butterfly egg deposition on subsequent caterpillar and pupal development, across  
572 different species of wild Brassicaceae. *Ecological Entomology* **40**, 444-450 (2015).
- 573 24 Al-Shehbaz, I. A. A generic and tribal synopsis of the Brassicaceae (Cruciferae). *Taxon* **61**,  
574 931-954 (2012).
- 575 25 Guo, X. *et al.* Plastome phylogeny and early diversification of Brassicaceae. *BMC Genomics*  
576 **18**, 176 (2017).
- 577 26 Huang, C.-H. *et al.* Resolution of Brassicaceae phylogeny using nuclear genes uncovers  
578 nested radiations and supports convergent morphological evolution. *Molecular Biology and*  
579 *Evolution* **33**, 394-412 (2015).
- 580 27 Beilstein, M. A., Al-Shehbaz, I. A. & Kellogg, E. A. Brassicaceae phylogeny and trichome  
581 evolution. *American Journal of Botany* **93**, 607-619 (2006).
- 582 28 Beilstein, M. A., Al-Shehbaz, I. A., Mathews, S. & Kellogg, E. A. Brassicaceae phylogeny  
583 inferred from phytochrome A and *ndhF* sequence data: tribes and trichomes revisited.  
584 *American Journal of Botany* **95**, 1307-1327 (2008).
- 585 29 Hall, J. C., Sytsma, K. J. & Iltis, H. H. Phylogeny of Capparaceae and Brassicaceae based  
586 on chloroplast sequence data. *American Journal of Botany* **89**, 1826-1842 (2002).
- 587 30 Graser, G., Schneider, B., Oldham, N. J. & Gershenzon, J. The methionine chain elongation  
588 pathway in the biosynthesis of glucosinolates in *Eruca sativa* (Brassicaceae). *Archives of*  
589 *Biochemistry and Biophysics* **378**, 411-419 (2000).

- 590 31 Rask, L. *et al.* Myrosinase: gene family evolution and herbivore defense in Brassicaceae.  
591 *Plant Molecular Biology* **42**, 93-114 (2000).
- 592 32 Windsor, A. J. *et al.* Geographic and evolutionary diversification of glucosinolates among  
593 near relatives of *Arabidopsis thaliana* (Brassicaceae). *Phytochemistry* **66**, 1321-1333 (2005).
- 594 33 Xue, J., Lenman, M., Falk, A. & Rask, L. The glucosinolate-degrading enzyme myrosinase  
595 in Brassicaceae is encoded by a gene family. *Plant Molecular Biology* **18**, 387-398 (1992).
- 596 34 Erb, M. & Robert, C. A. M. Sequestration of plant secondary metabolites by insect  
597 herbivores: molecular mechanisms and ecological consequences. *Current Opinion in Insect*  
598 *Science* **14**, 8-11 (2016).
- 599 35 Heidel-Fischer, H. M. *et al.* An insect counteradaptation against host plant defenses evolved  
600 through concerted neofunctionalization. *Molecular Biology and Evolution* **36**, 930-941  
601 (2019).
- 602 36 Winde, I. & Wittstock, U. Insect herbivore counteradaptations to the plant glucosinolate-  
603 myrosinase system. *Phytochemistry* **72**, 1566-1575 (2011).
- 604 37 Edger, P. P. *et al.* The butterfly plant arms-race escalated by gene and genome duplications.  
605 *Proceedings of the National Academy of Sciences of the United States of America*  
606 201503926 (2015).
- 607 38 Braby, M. F. & Trueman, J. W. H. Evolution of larval host plant associations and adaptive  
608 radiation in pierid butterflies. *Journal of Evolutionary Ecology* **19**, 1677-1690 (2006).
- 609 39 Griese, E. *et al.* Plant responses to butterfly oviposition partly explain preference-  
610 performance relationships on different brassicaceous species. *bioRxiv*, **706044** (2019).
- 611 40 Little, D., Gouhier-Darimont, C., Bruessow, F. & Reymond, P. Oviposition by pierid  
612 butterflies triggers defense responses in *Arabidopsis*. *Plant Physiology* **143**, 784-800 (2007).
- 613 41 Reymond, P. J. P. Perception, signaling and molecular basis of oviposition-mediated plant  
614 responses. **238**, 247-258 (2013).
- 615 42 Ratnasingham, S. & Hebert, P. D. N. BOLD: The Barcode of Life Data System  
616 (<http://www.barcodinglife.org>). *Molecular Ecology Notes* **7**, 355-364 (2007).
- 617 43 Miller, M. A., Pfeiffer, W. & Schwartz, T. in *2010 Gateway Computing Environments*  
618 *Workshop (GCE)*. 1-8.
- 619 44 Stamatakis, A. RAxML version 8: a tool for phylogenetic analysis and post-analysis of large  
620 phylogenies. *Bioinformatics* **30**, 1312-1313 (2014).
- 621 45 Chernomor, O., Minh, B. Q. & von Haeseler, A. Terrace aware data structure for  
622 phylogenomic inference from supermatrices. *Systematic Biology* **65**, 997-1008 (2016).
- 623 46 Hoang, D. T., Vinh, L. S., Chernomor, O., Minh, B. Q. & von Haeseler, A. UFBoot2:  
624 Improving the ultrafast bootstrap approximation. *Molecular Biology and Evolution* **35**, 518-  
625 522 (2017).
- 626 47 Trifinopoulos, J., Nguyen, L.-T., Minh, B. Q. & von Haeseler, A. W-IQ-TREE: a fast online  
627 phylogenetic tool for maximum likelihood analysis. *Nucleic Acids Research* **44**, W232-  
628 W235 (2016).
- 629 48 Braby, M. F., Vila, R. & Pierce, N. E. Molecular phylogeny and systematics of the Pieridae  
630 (Lepidoptera: Papilionoidea): Higher classification and biogeography. *Zoological Journal of*  
631 *the Linnean Society* **147**, 239-275 (2006).
- 632 49 Ronquist, F. *et al.* MrBayes 3.2: Efficient bayesian phylogenetic inference and model choice  
633 across a large model space. *Systematic Biology* **61**, 539-542 (2012).
- 634 50 Tracer v1.5.0 (2009).
- 635 51 R: A Language and Environment for Statistical Computing v. 3.3.2 "Sincere Pumpkin  
636 Patch" (R Foundation for Statistical Computing, Vienna, Austria, 2016).
- 637 52 Nallu, S. *et al.* The molecular genetic basis of herbivory between butterflies and their host  
638 plants. *Nature Ecology and Evolution* **2**, 1418-1427 (2018).

- 639 53 Geuss, D., Stelzer, S., Lortzing, T. & Steppuhn, A. *Solanum dulcamara's* response to eggs  
640 of an insect herbivore comprises ovicidal hydrogen peroxide production. *Plant, Cell and*  
641 *Environment* **40**, 2663-2677 (2017).
- 642 54 Mohammadin, S. *et al.* Genome-wide nucleotide diversity and associations with geography,  
643 ploidy level and glucosinolate profiles in *Aethionema arabicum* (Brassicaceae). *Plant*  
644 *Systematics and Evolution* **304**, 619-630 (2018).
- 645 55 Fei, M., Gols, R. & Harvey, J. A. Seasonal phenology of interactions involving short-lived  
646 annual plants, a multivoltine herbivore and its endoparasitoid wasp. *Journal of Animal*  
647 *Ecology* **83**, 234-244 (2014).
- 648 56 Friberg, M., Posledovich, D. & Wiklund, C. J. O. Decoupling of female host plant  
649 preference and offspring performance in relative specialist and generalist butterflies.  
650 *Oecologia* **178**, 1181-1192 (2015).
- 651 57 Tolman, T. & Lewington, R. *Collins butterfly guide: The most complete field guide to the*  
652 *butterflies of Britain and Europe*. (Harper Collins, 2009).
- 653 58 Harvey, J. A., Witjes, L. M. A., Benkirane, M., Duyts, H. & Wagenaar, R. J. P. E.  
654 Nutritional suitability and ecological relevance of *Arabidopsis thaliana* and *Brassica*  
655 *oleracea* as foodplants for the cabbage butterfly, *Pieris rapae*. *Plant Ecology* **189**, 117-126  
656 (2007).
- 657 59 Wiklund, C. & Friberg, M. The evolutionary ecology of generalization: among-year  
658 variation in host plant use and offspring survival in a butterfly. *Ecology* **90**, 3406-3417  
659 (2009).
- 660 60 Vrolings, T. *Intraspecific variation of Pieris rapae oviposition-induced plant defences in*  
661 *different natural accessions of Arabidopsis thaliana* Master thesis, Wageningen University,  
662 (2014).
- 663 61 Züst, T. *et al.* Rapid and independent evolution of ancestral and novel defenses in a genus of  
664 toxic plants (*Erysimum*, Brassicaceae). *BioRxiv* **761569** (2019).
- 665 62 Courtney, S. P. The evolution of egg clustering by butterflies and other insects. *The*  
666 *American Naturalist* **123**, 276-281 (1984).
- 667 63 Clark, B. R. & Faeth, S. H. The evolution of egg clustering in butterflies: A test of the egg  
668 desiccation hypothesis. *Evolutionary Ecology* **12**, 543-552, (1998).
- 669 64 Wiklund, C. & Åhrberg, C. Host plants, nectar source plants, and habitat selection of males  
670 and females of *Anthocharis cardamines* (Lepidoptera). *Oikos* **31**, 169-183 (1978).

671

672

673

674

675

676
